# Supplementary material for: Influence of mid-latitude Sea Surface Temperature Fronts on the Atmospheric Water Cycle and Storm Track Activity
Source: Copernicus journal article supplement (doi:10.5194/egusphere-2024-735), 2024-03-14
Supplement: Supplementary file 1 [file egusphere-2024-735-supplement.pdf]

## 1 Introduction

This supplementary material consists of 6 figures that support our arguments in the main text but are not necessarily required to be shown in the main text.

## 2 Supplementary figures

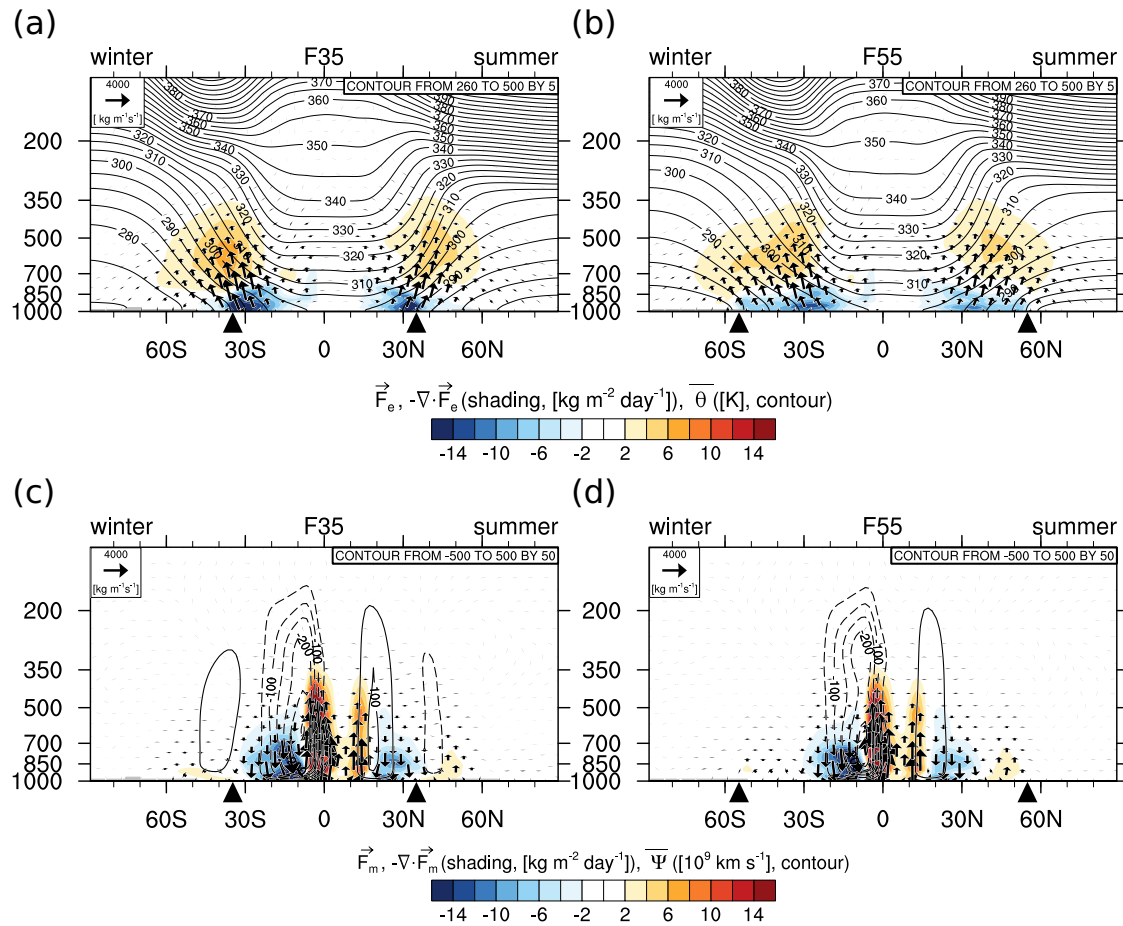

**Figure S1.** as fig. 3, but for F35, F55.

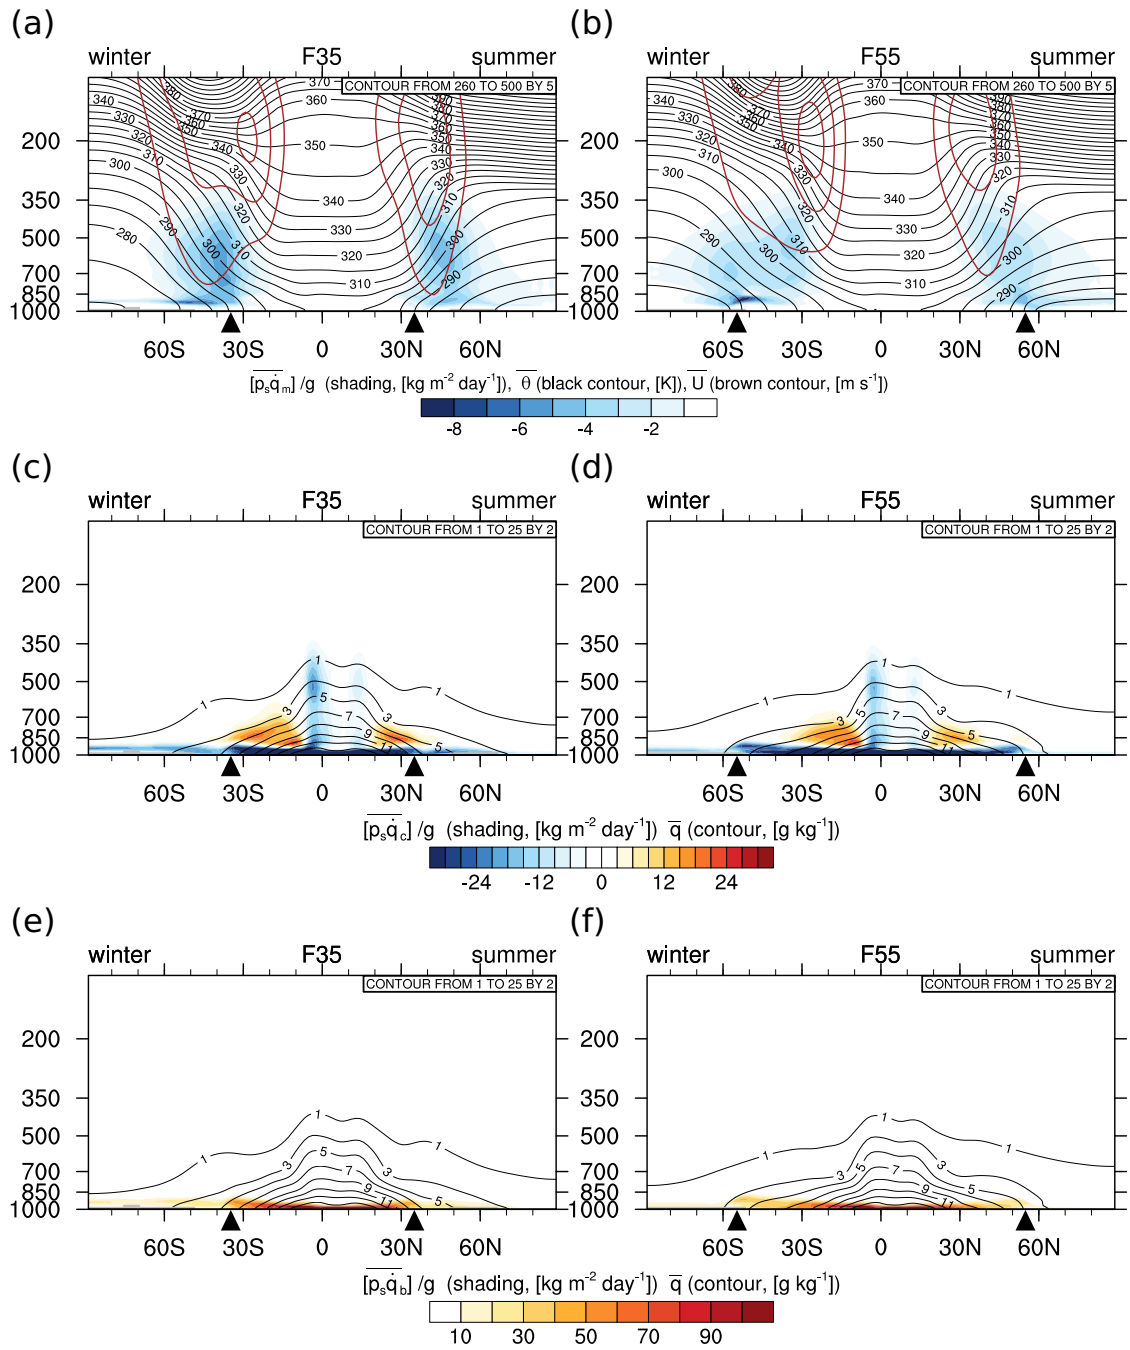

Figure S2. as fig. 4, but for F35, F55.

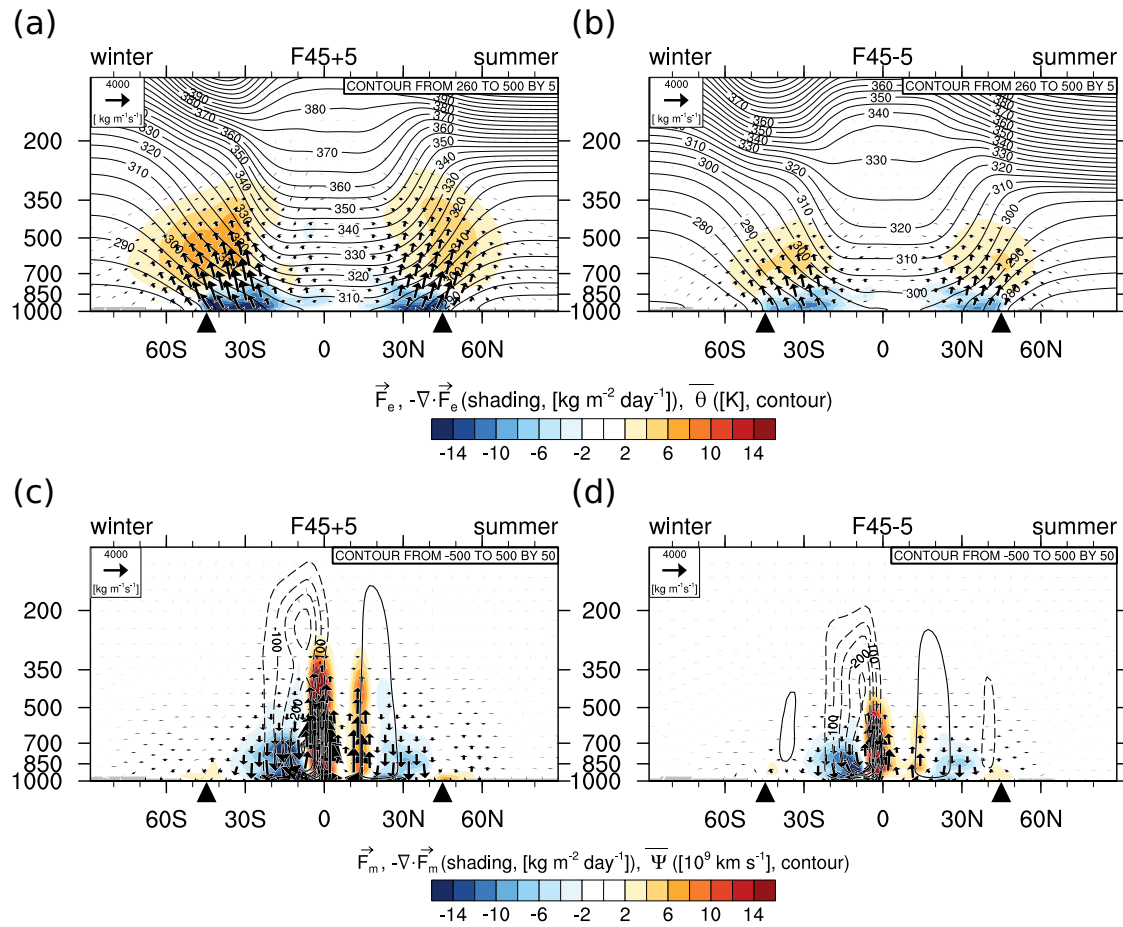

Figure S3. as fig. 3, but for F45+5, F45-5.

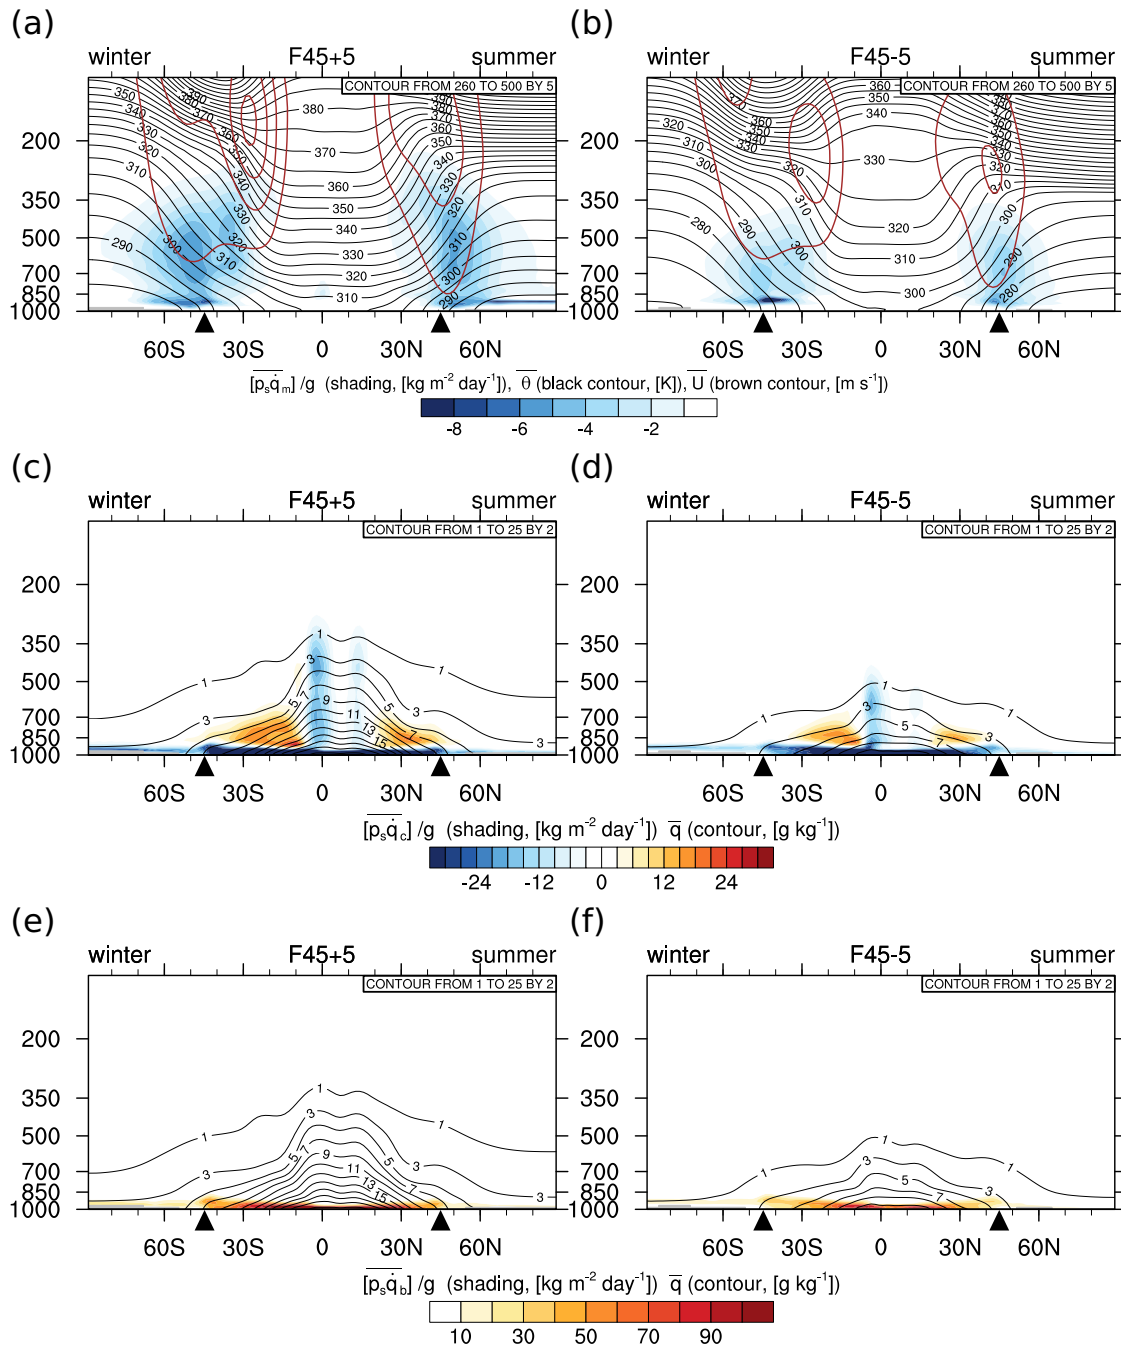

Figure S4. as fig. 4, but for 45+5, F45-5.

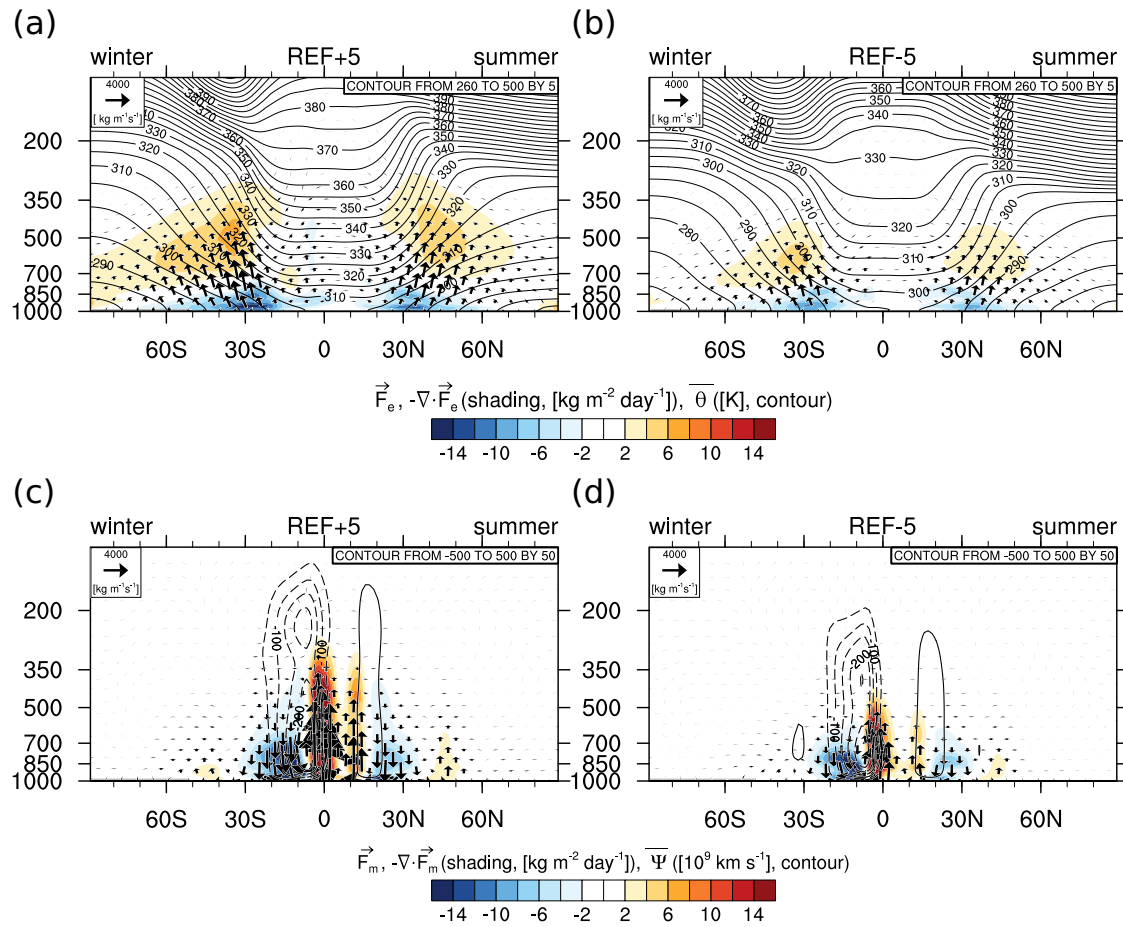

Figure S5. as fig. 3, but for REF+5, REF-5.

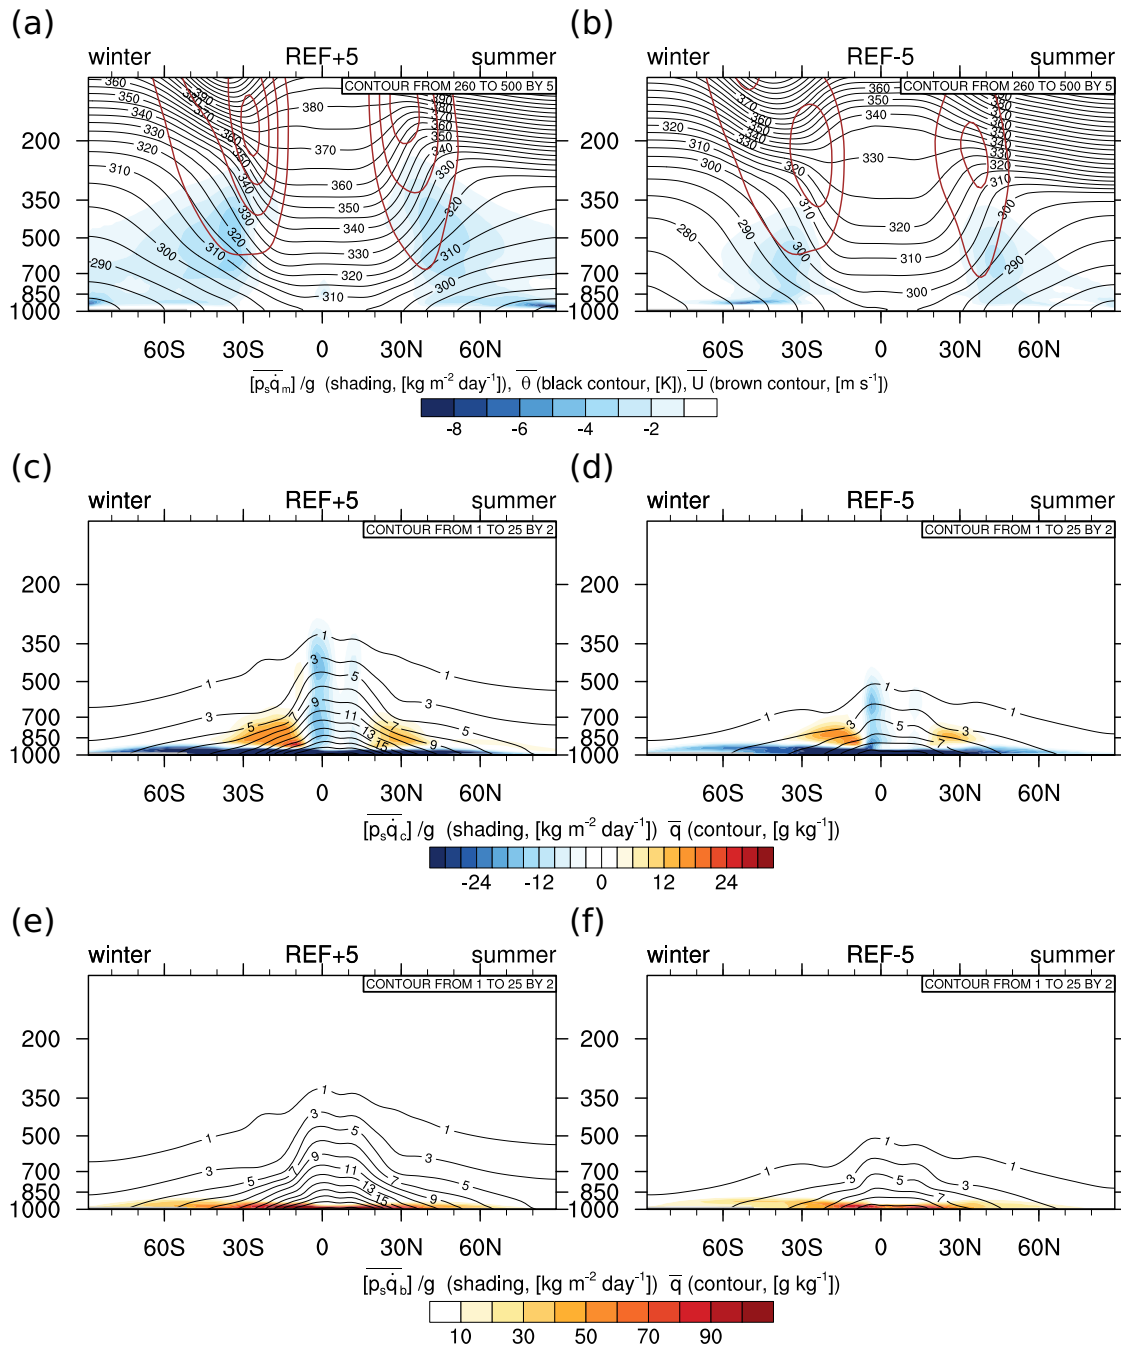

Figure S6. as fig. 4, but for REF+5, REF-5.
