# Supplementary material for: Influence of mid-latitude Sea Surface Temperature Fronts on the Atmospheric Water Cycle and Storm Track Activity
Source: Copernicus journal article supplement (doi:10.5194/egusphere-2024-735), 2024-03-14

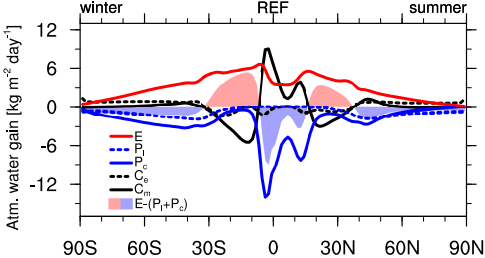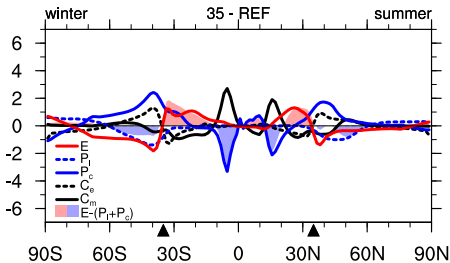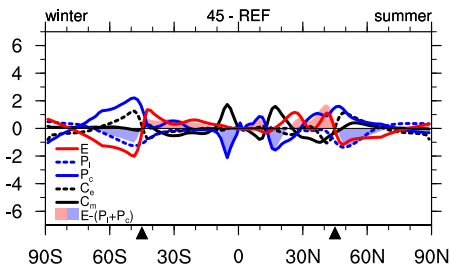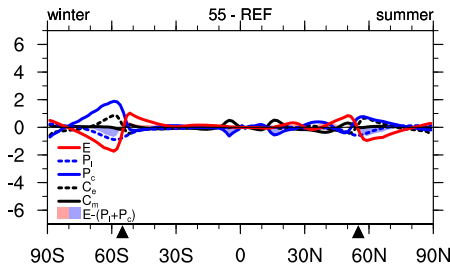

Supplement: Supplementary file [file egusphere-2024-735-AC2-supplement.pdf]
